# Supplementary material
Source: publisher figshare collection journal article supplement (https://tandf.figshare.com/ndownloader/files/21468942)
Supplement: Supplementary file 1 [file 21468942]

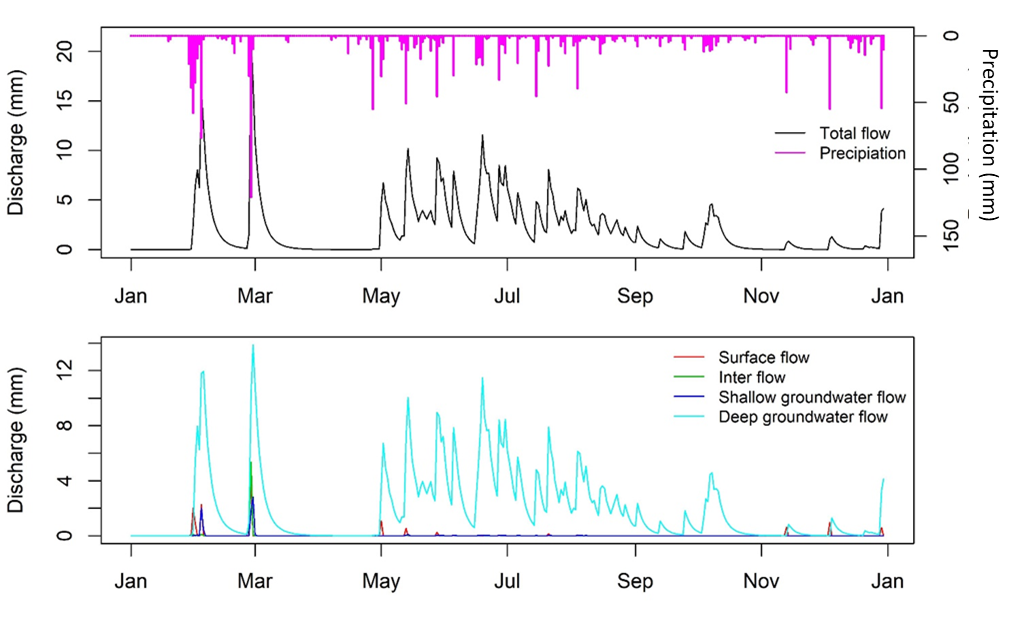


Figure S1: Comparison of daily observed and simulated flows for an average year (2004) and partition of flows via different pathways in the Waitangi catchment


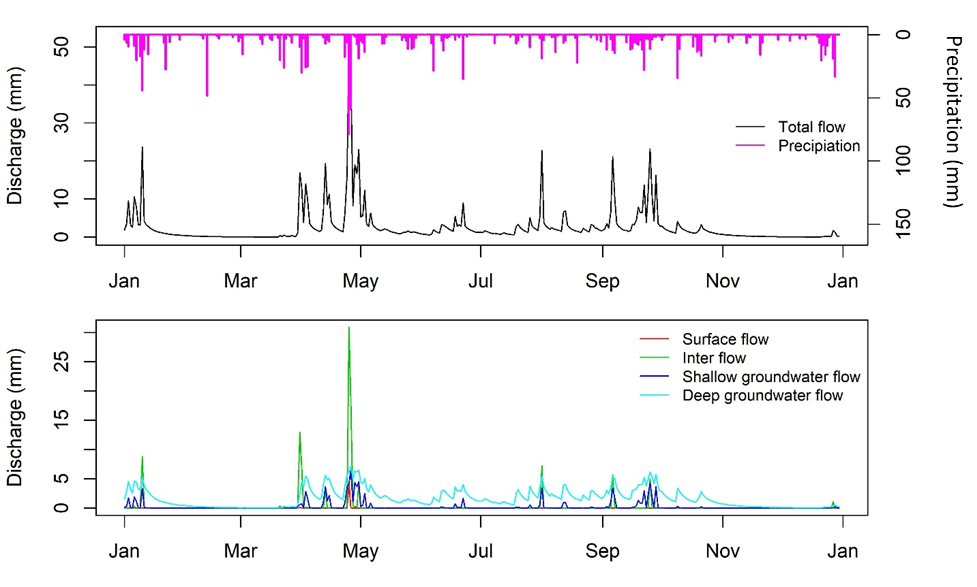


Figure S2: Comparison of daily observed and simulated flows for an average year (2010) and partition of flows via different pathways in the Aparima catchment


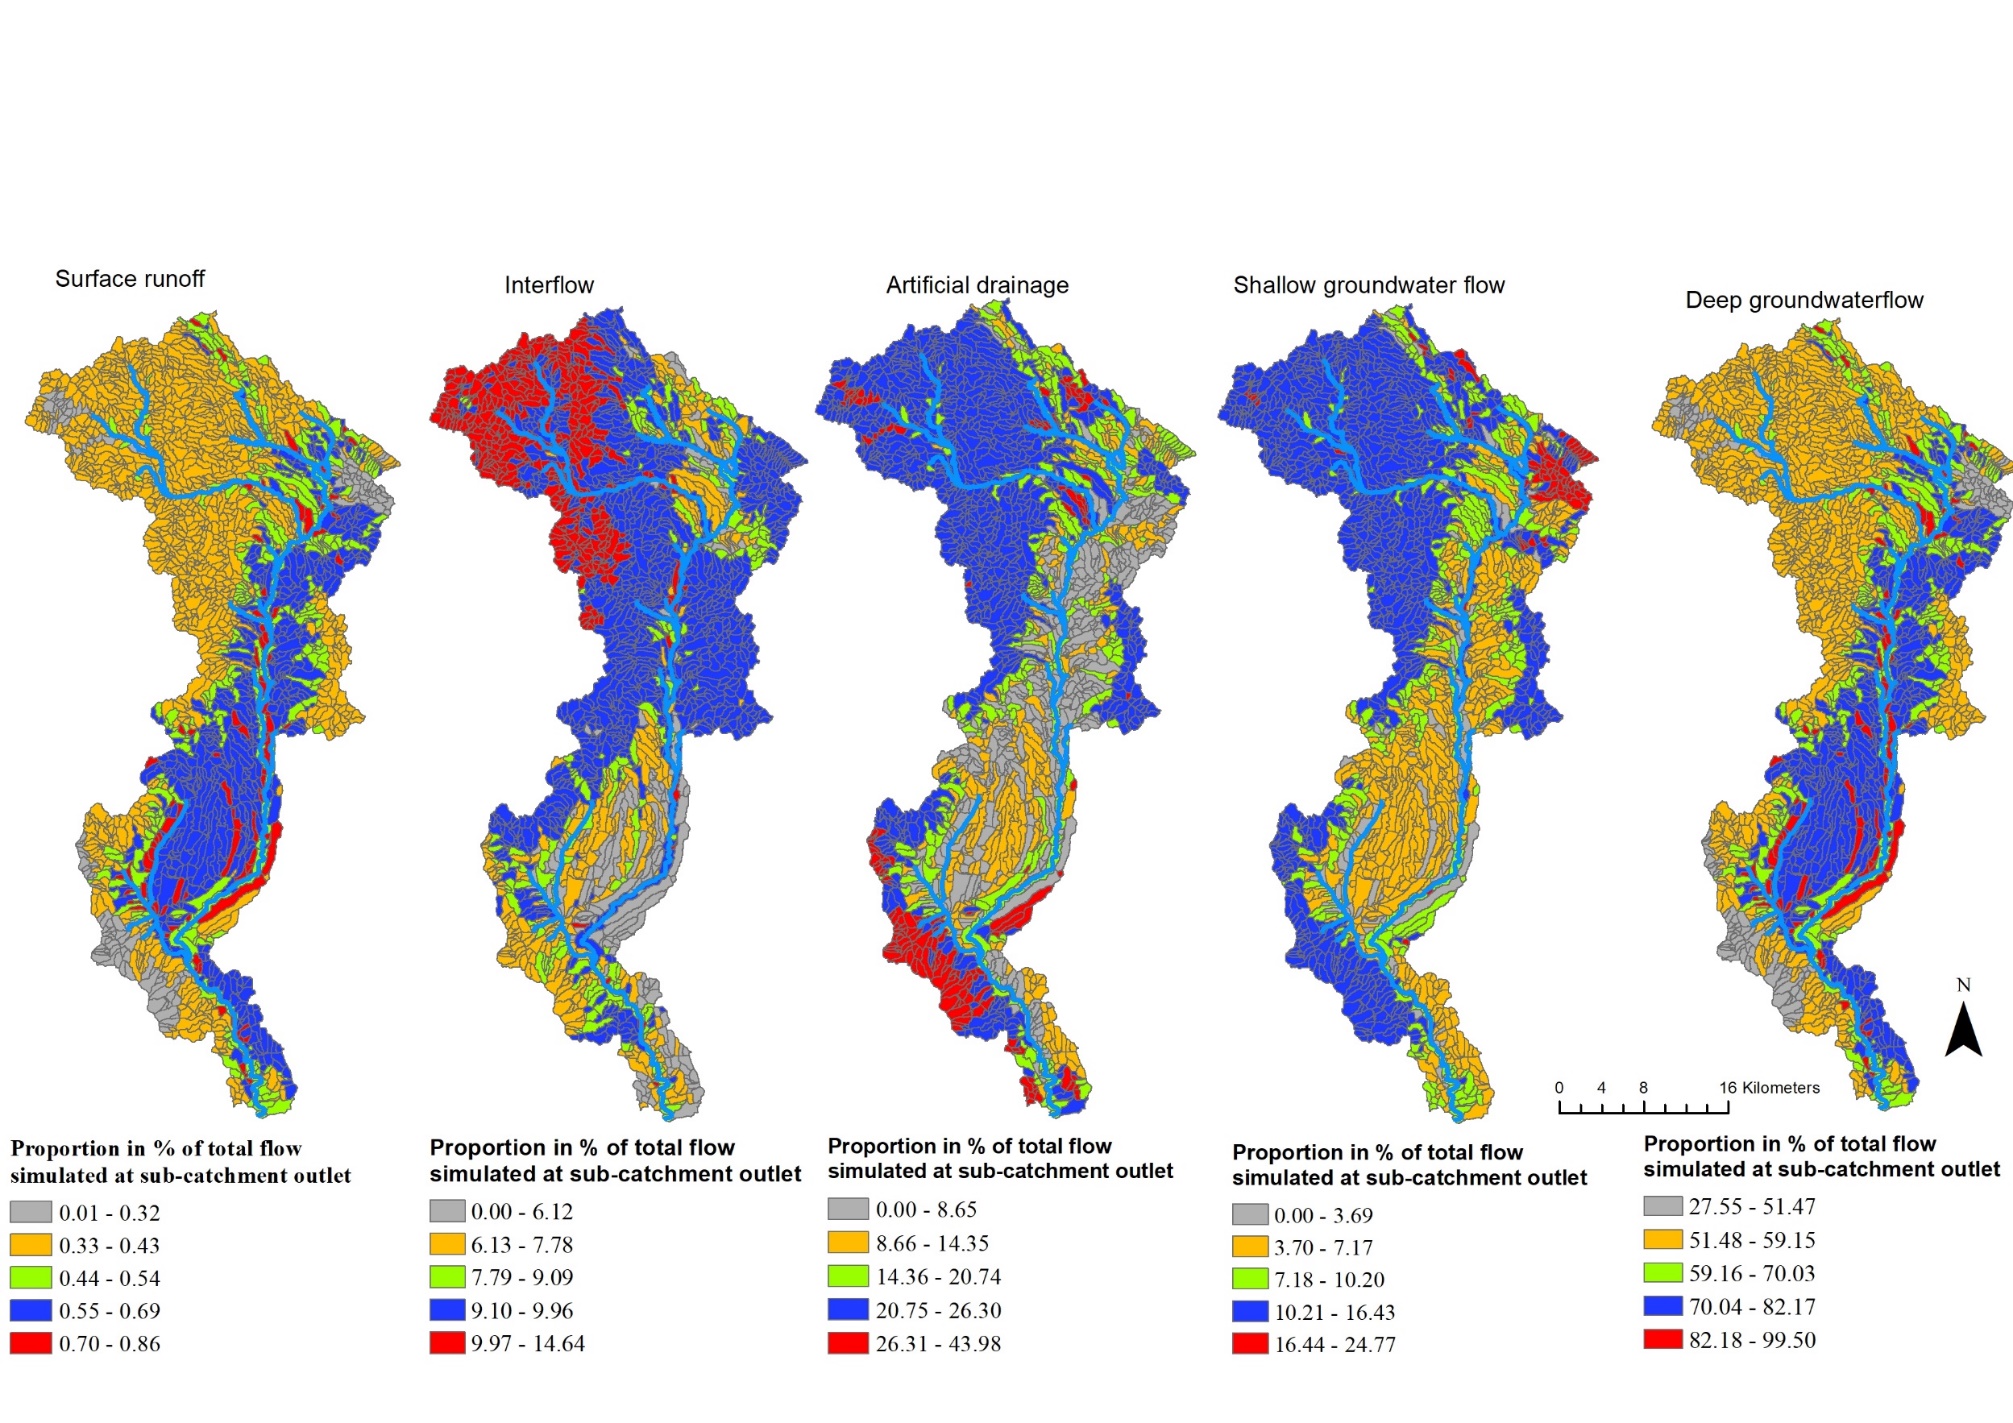


Figure S3. Estimated flow contribution (percentage of total simulated) to the Aparima catchment outlet. Blue lines indicate surface drainage network.


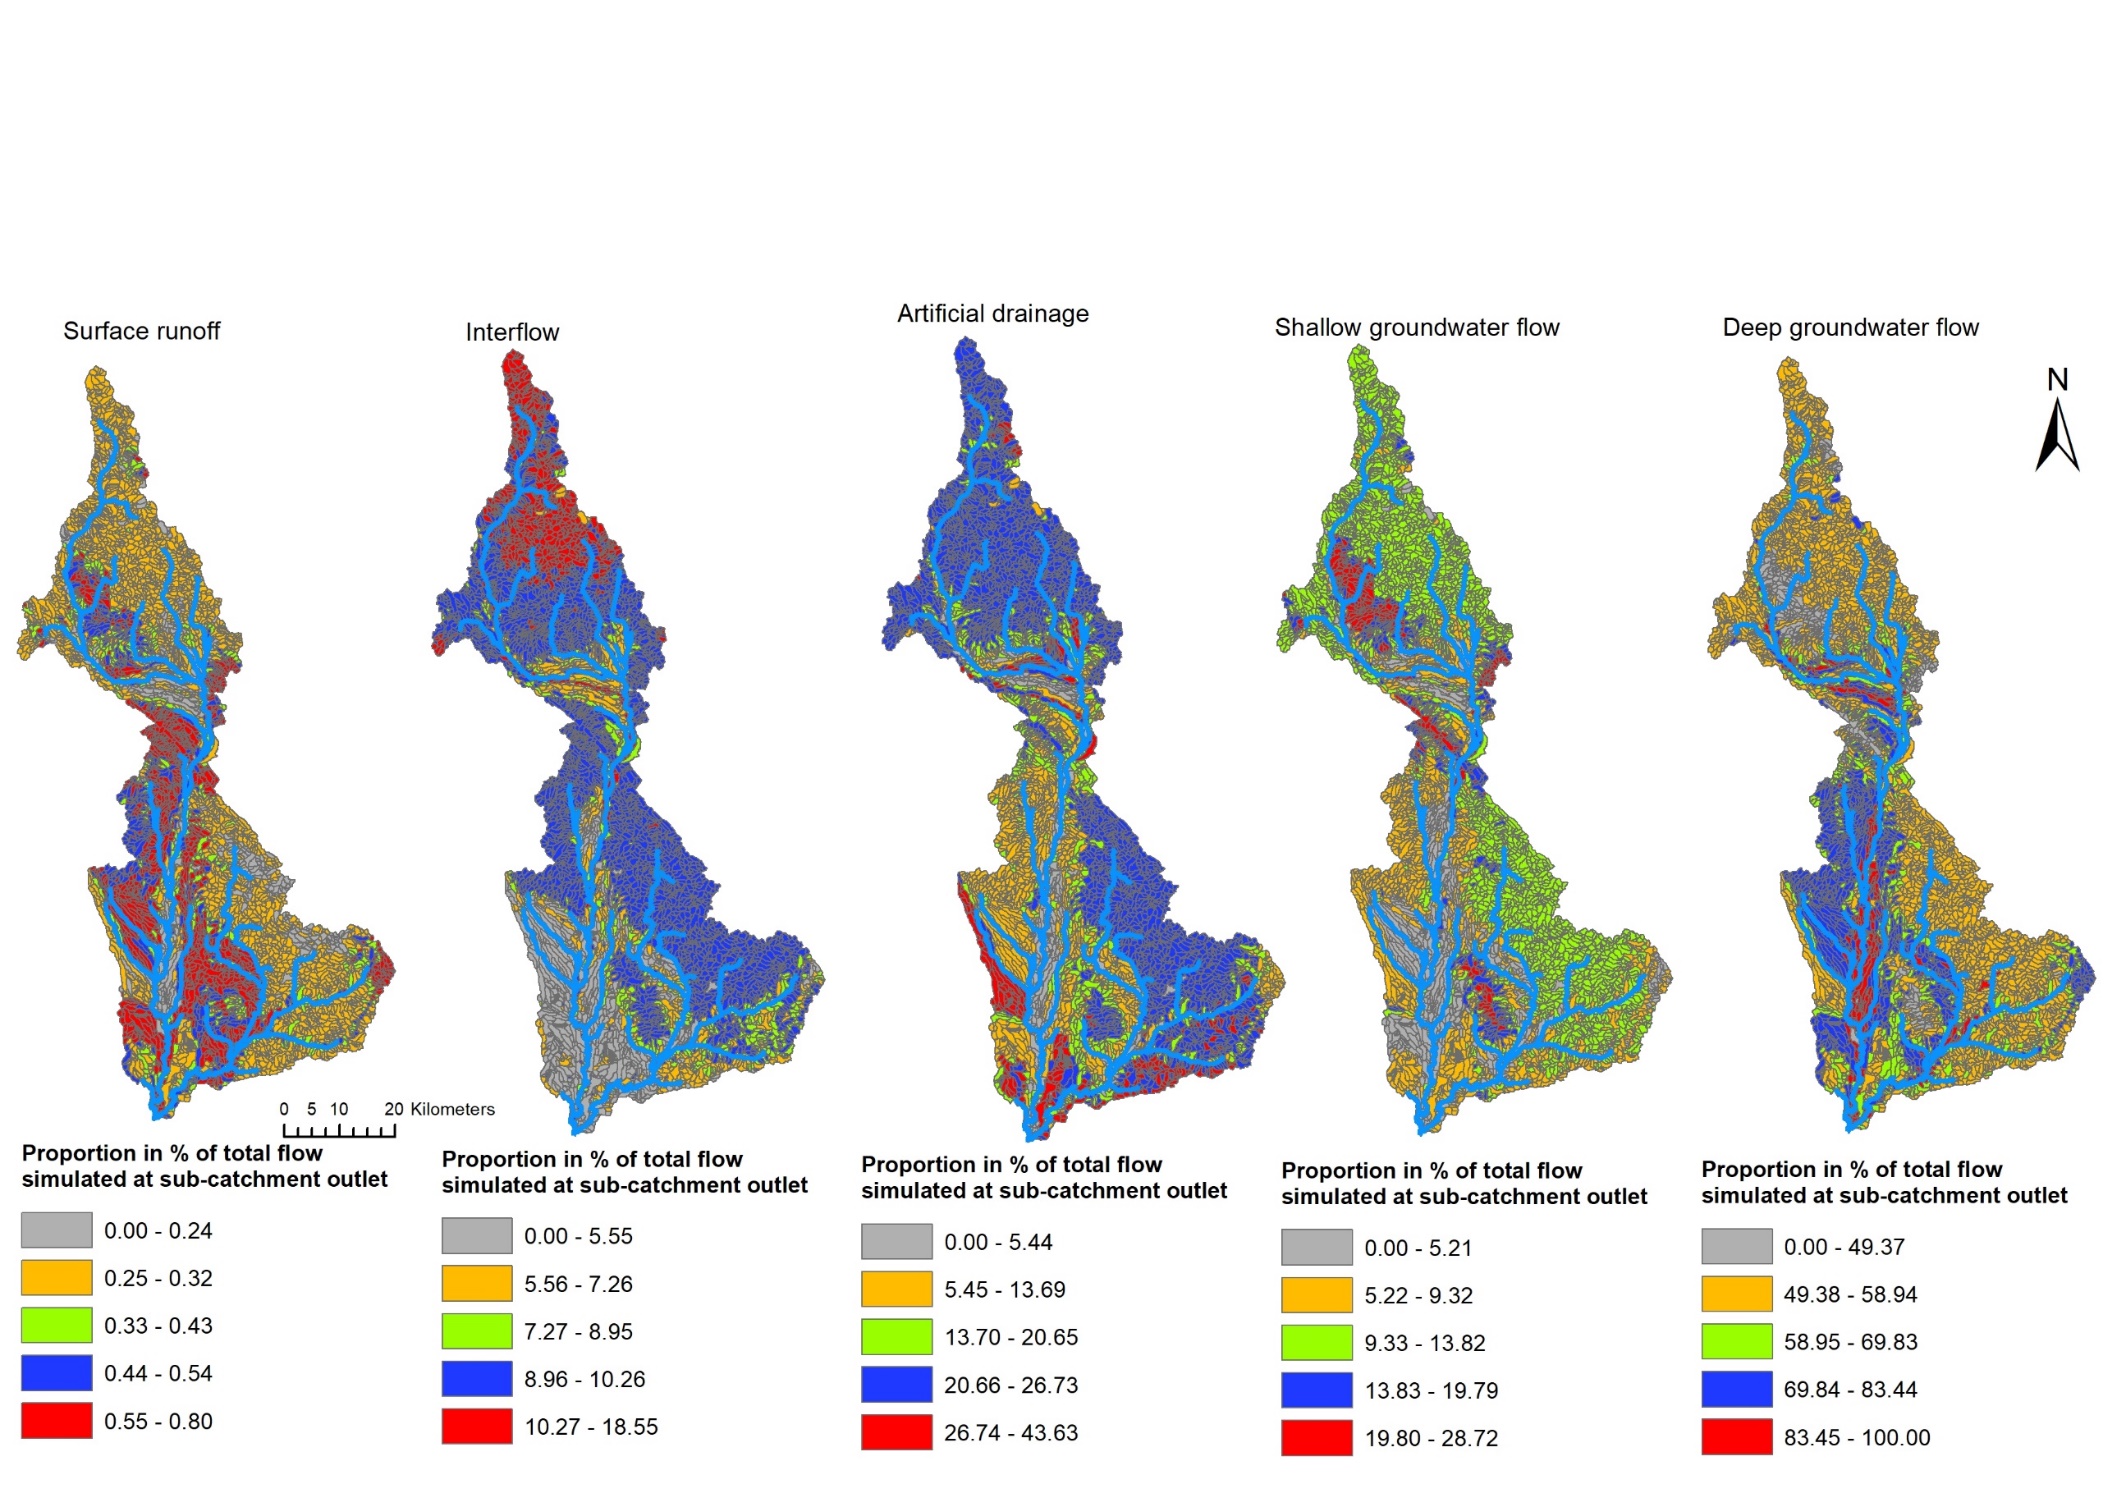


Figure S4. Estimated flow contribution (percentage of total flow simulated) to the Oreti catchment outlet. Blue lines indicate surface drainage network.


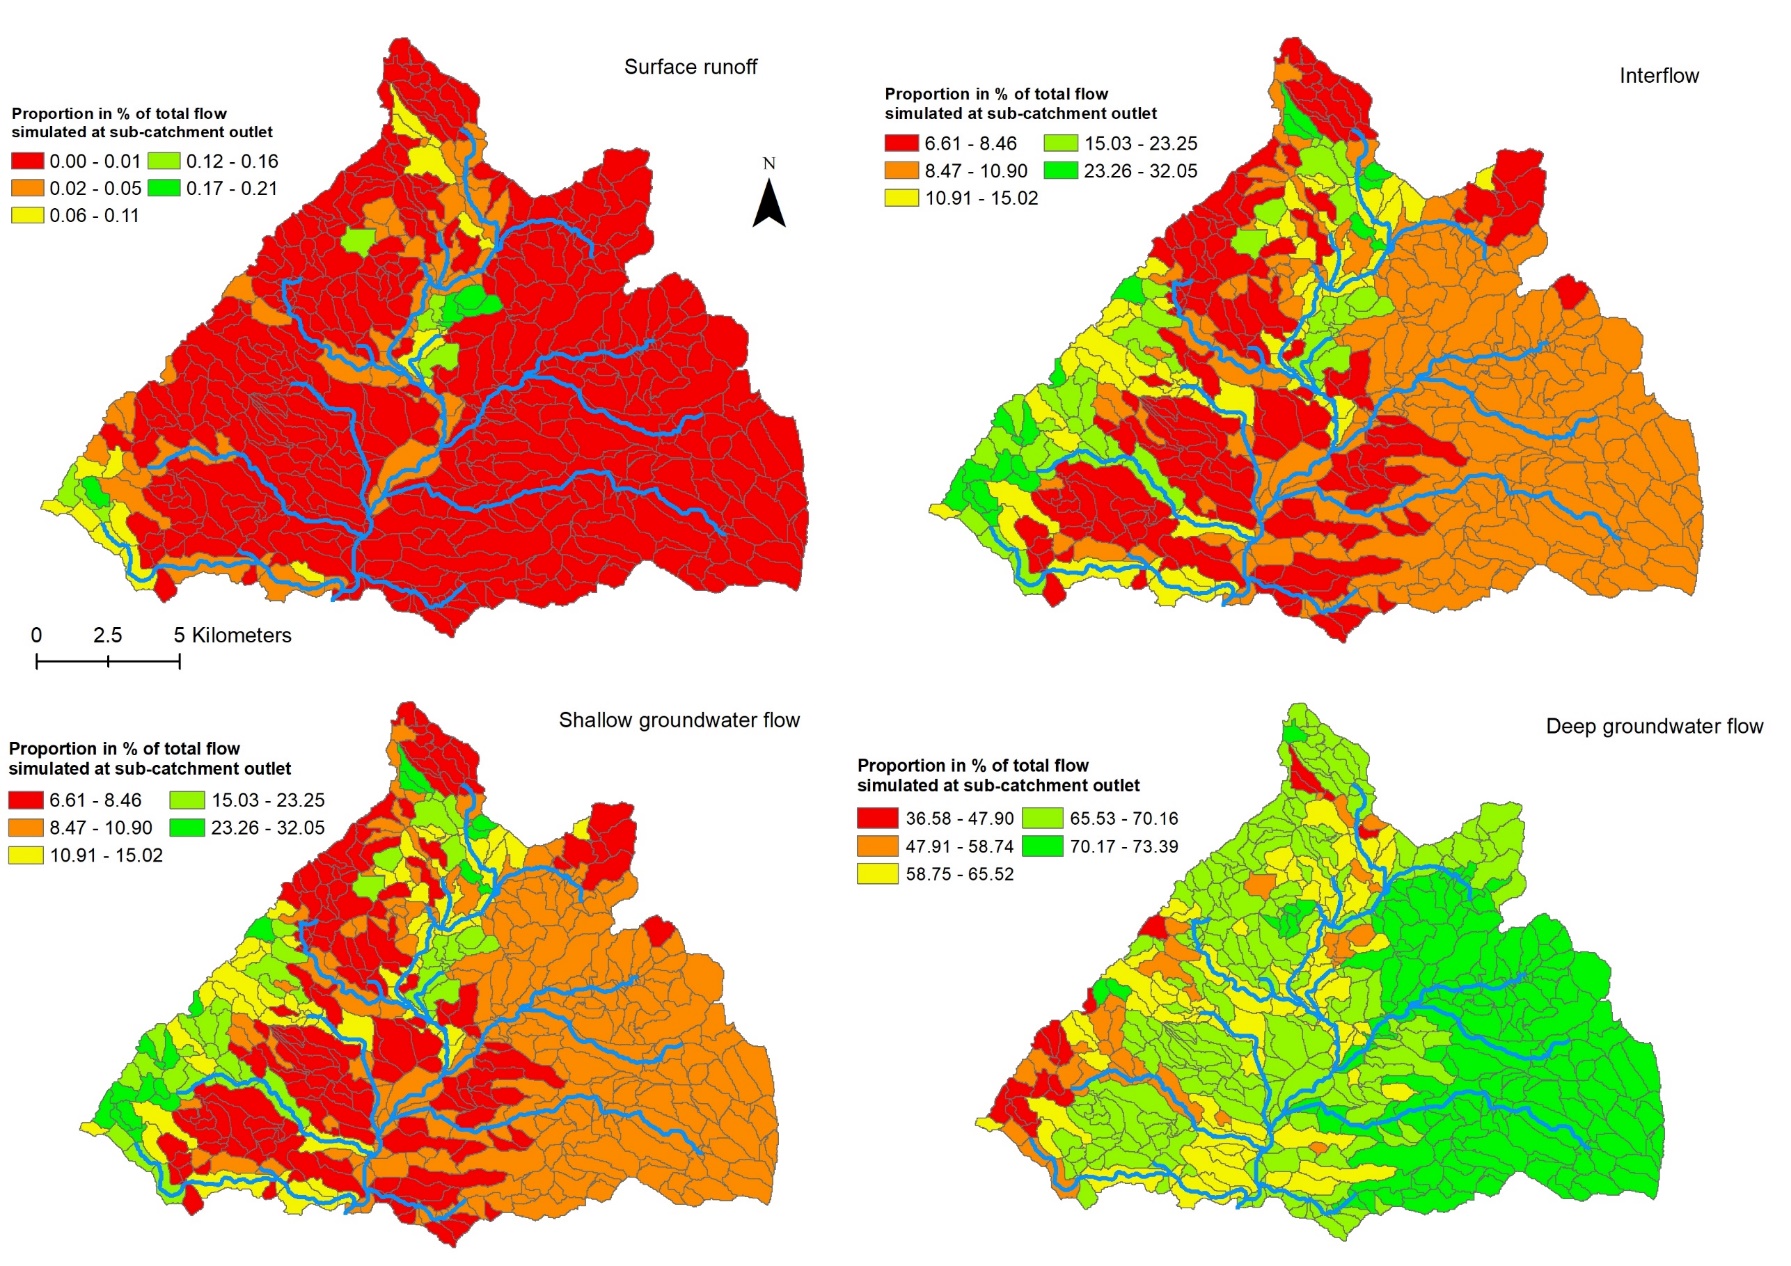


Figure S5. Estimated flow contribution (percentage of total flow simulated) to the Waiotapu catchment outlet. Blue lines indicate surface drainage network.


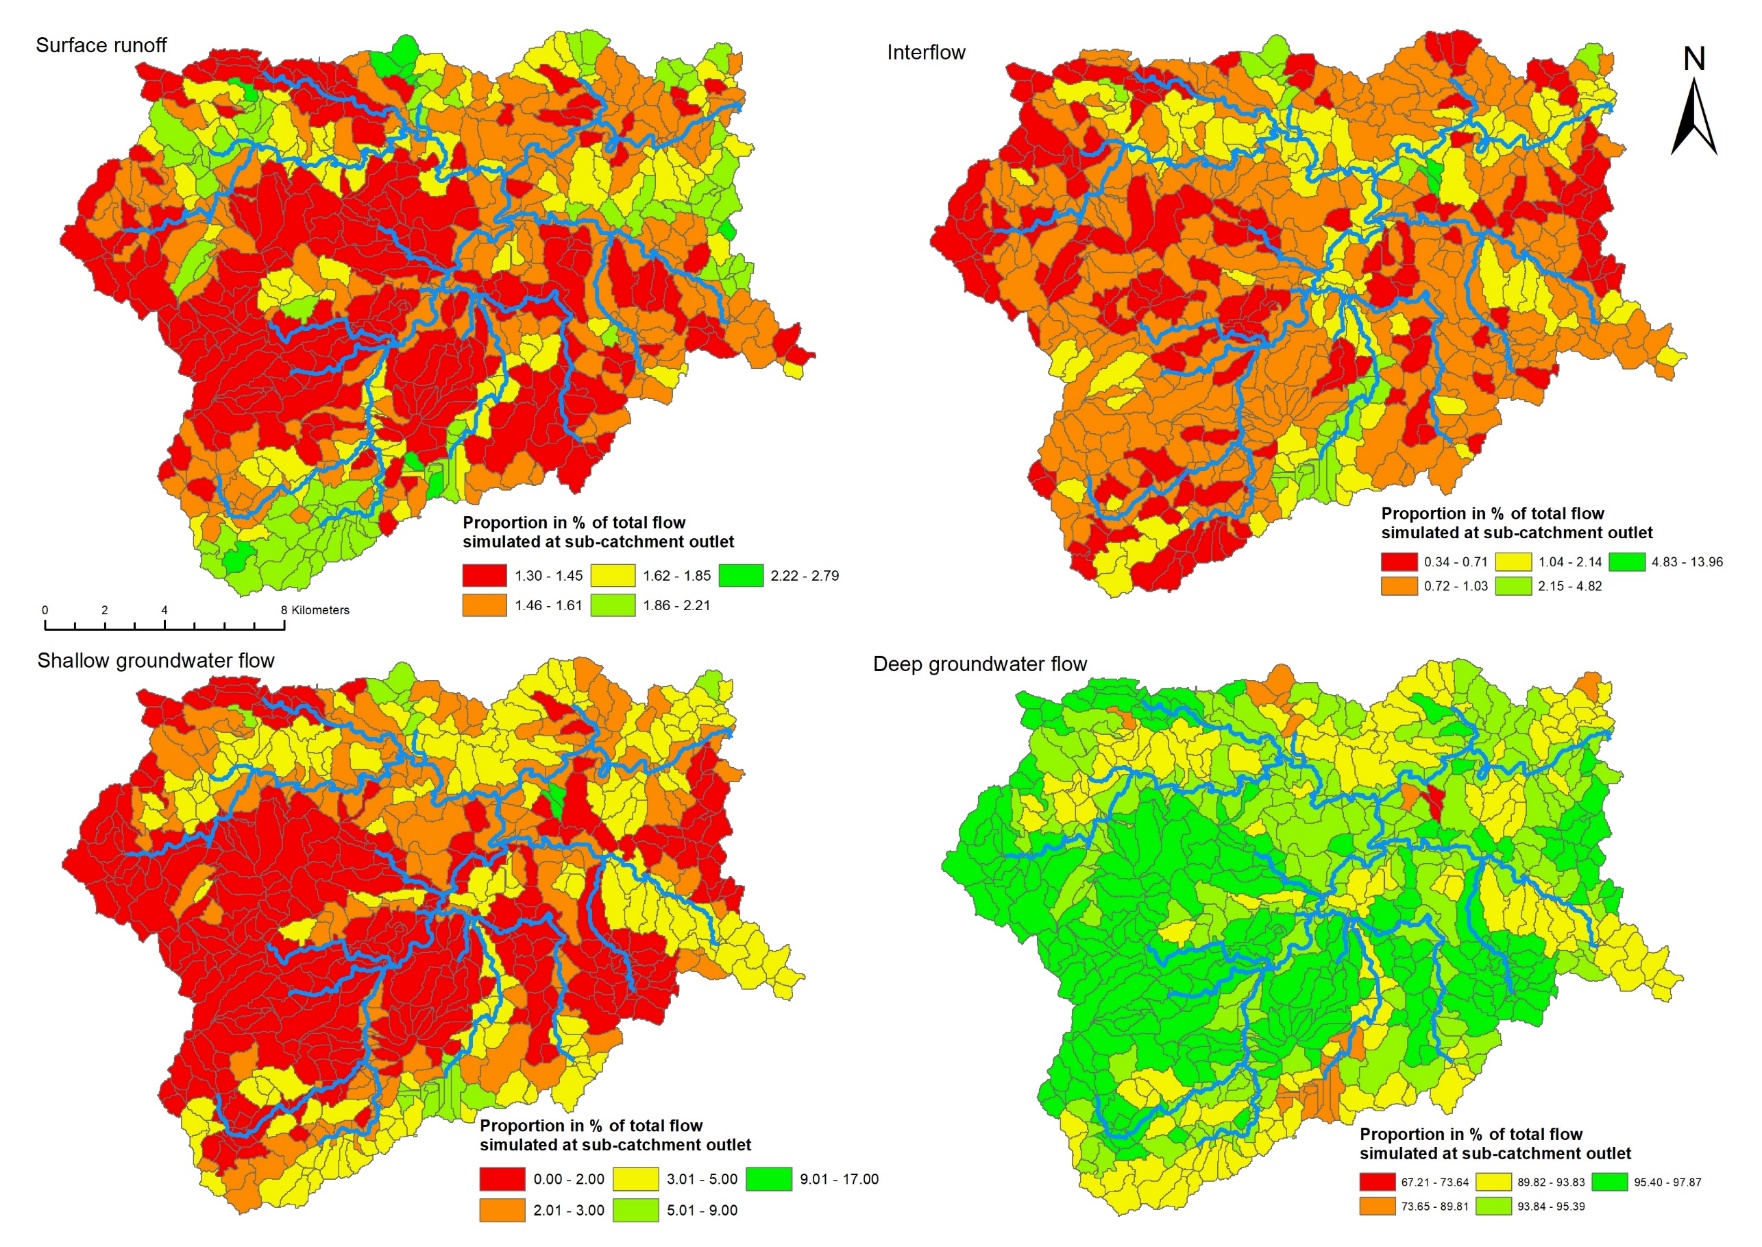


Figure S6. Estimated flow contribution (percentage of total flow simulated) to the Waitangi catchment outlet. Blue lines indicate surface drainage network.
